# Supplementary material for: A one-tube dual-readout biosensor for detection of nucleic acids and non-nucleic acids using CRISPR-ALP tandem assay
Source: Royal Society of Chemistry journal article supplement (doi:10.1039/d3an00918a), 2023-01-01
Supplement: d3an00918a1.pdf [file d3an00918a1.pdf]

## Supplementary Materials

### One-tube dual-readout biosensor for detection of nucleic acids and non-nucleic acids using CRISPR-ALP tandem assay

, Xinxin Ke<sup>a</sup>, Yi Hu<sup>b</sup>, Chuanxia Chen<sup>c,\*</sup>, Tao Hu<sup>a,\*</sup>

<sup>a</sup>Children's Hospital, Zhejiang University School of Medicine, National Clinical Research Center for Child Health, Hangzhou, 310052, China.

<sup>b</sup>Hefei National Lab for Physical Sciences at the Microscale and the Centers for Biomedical Engineering, University of Science and Technology of China, Hefei, 230027, China.

<sup>c</sup>School of Materials Science and Engineering, University of Jinan, Jinan, Shandong, 250022, China.

\*Corresponding authors: [hutaozd@zju.edu.cn](mailto:hutaozd@zju.edu.cn); [mse\\_chencx@ujn.edu.cn](mailto:mse_chencx@ujn.edu.cn).

This document includes:  
Supplementary methods  
Figures S1 to S8  
Tables S1 to S2  
Supplementary references

**Supplementary method**

## **PAGE**

Native polyacrylamide gel electrophoresis (20%) was conducted to characterize the cleaved products of hyDNA. Prepared samples were mixed with 6 X loading buffer and the electrophoresis was performed at a voltage of 100V for 30 to 60 min. 0.5 X TBE buffer was used as the electrophoresis buffer in the experiment. The gel was visualized with Gel Doc XR (BioRad Company, USA).

## **Preparation of MB@hyDNA**

HyDNA sense strand (400 nM) and anti-sense strand (400 nM) were dissolved in buffer (pH 7.4, 20 mM Tris-HCl, 300 mM NaCl) and denatured at 95 °C for 10 min. Then, they were cooled at room temperature for 1 h to form hyDNA. Then, streptavidin-MB beads (4 µL) were washed with 100 µL buffer (pH 7.4, 20 mM Tris-HCl, 300 mM NaCl) for three times and incubated with 400 nM hyDNA for 30 min. Afterwards, the supernatant was removed and washed three times with 100 µL PBS buffer.

## **Preparation of tyramine-ALP conjugates**

10 µL of 10 mM biotin-tyramine was incubated with 2 µL of 0.4 mg/mL streptavidin-ALP in 100 µL buffer (pH 8.0, 20 mM Tris-HCl) for 30 min. After that, 4 µL of 50 mM biotin was added to block the remaining streptavidin sites. Afterwards, the resultant mixtures were centrifuged (13500 x g) for 15 min at 4 °C to remove the extra biotin and biotin-tyramine for three times. Finally, the obtained tyramine-ALP conjugates were resuspended in 50 µL of PBS buffer and stored at 4 °C for further use.

## **RPA assay**

RaPure virus RNA/DNA kit was used to extract nucleic acids of pseudoviruses. Specific targets of SARS-CoV-2 and Monkeypox Virus were amplified by using RPA and RT-RPA kit. The reaction buffer contained 1 µL of 10 µM each primer, 12.5 µL reaction buffer V, 4.0 µL water and 5.0 µL template. 1.5 µL of 280 mM MgOAc were then added to the tube and the mixture was incubated at 37°C for 15 min. The amplification products were subsequently analyzed by 2% agarose gel electrophoresis. The experiment was conducted in 0.5 X TBE buffer. The gel was visualized by Gel Doc XR (BioRad Company, USA).

## **Preparation of ATP solution**

ATP-activator (5 µM), probe-1(10 µM), and probe-2 (10 µM) were dissolved in buffer (pH 7.4, 40 mM HEPES, 100 mM NaCl, 20 mM MgCl<sub>2</sub>) and heated to 95 °C for 10 min to form the locked activator. 5 µL of different concentrations of ATP were mixed with 5 µL of locked activator for 10 min to obtain ATP solution for ATP detection.

## **Supplementary figures**

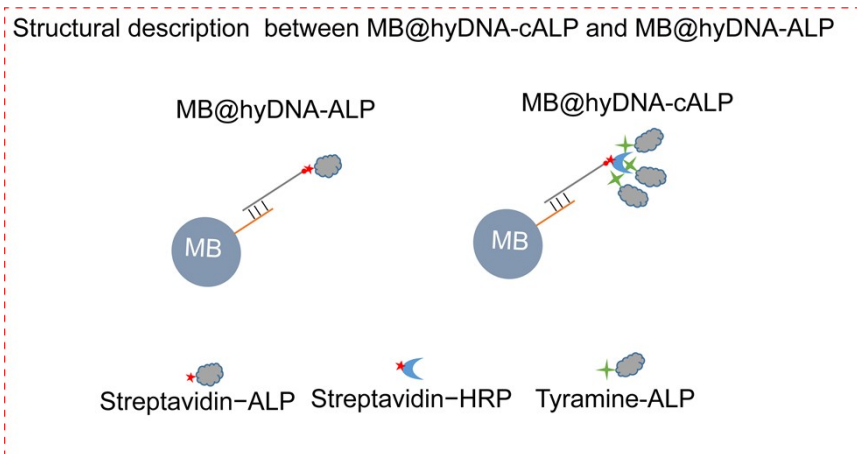

**Fig. S1** The detailed structural description MB@hyDNA-cALP and MB@hyDNA-ALP.

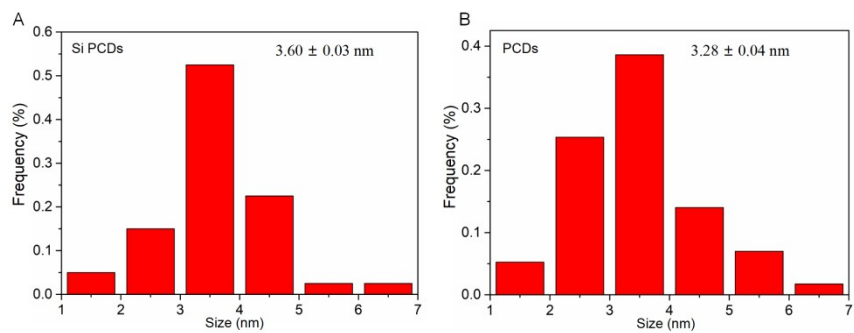

**Fig. S2** The frequency versus particle size of Si PCDs (A) and PCDs (B).

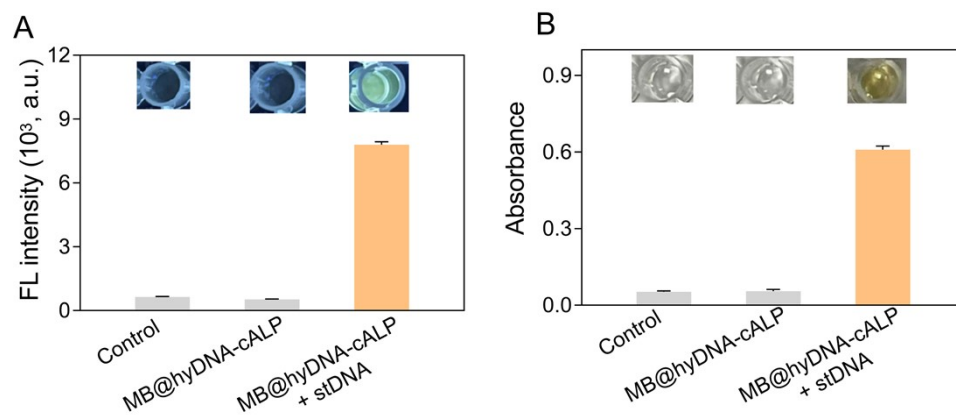

**Fig. S3** The feasibility of the established Calpin-CRISPR platform for FL (A) and absorbance (B) intensity detection of stDNA target based on PCDs. The insets in (A) and (B) show the visual images under UV and white light, respectively.

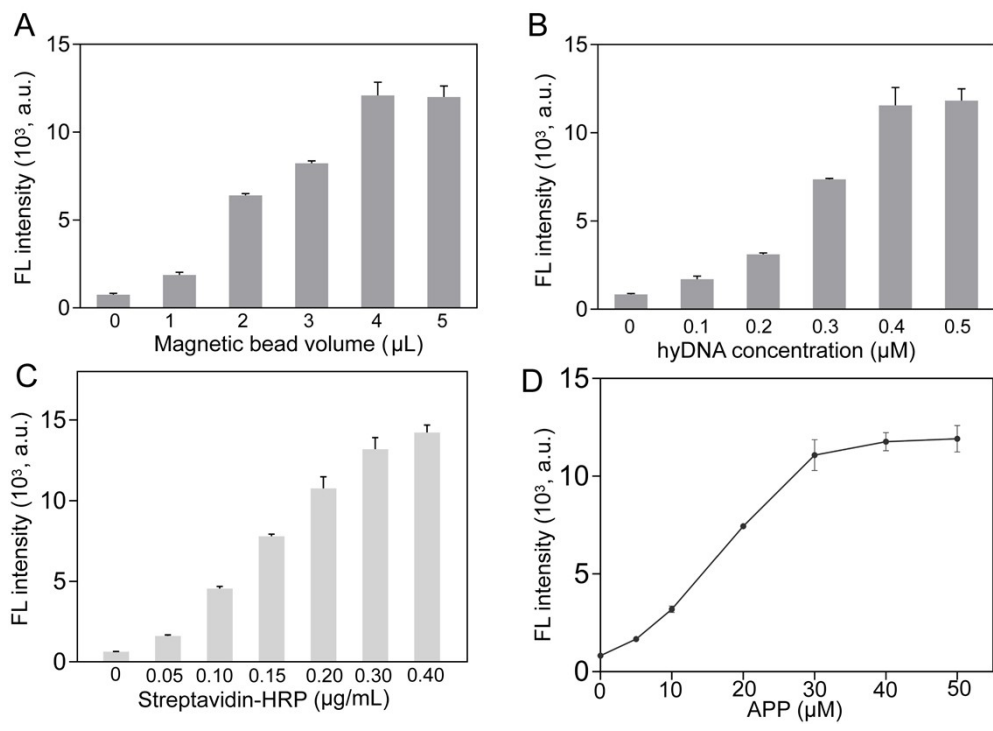

**Fig. S4** (A) The FL intensity versus different volumes of MB. (B) The FL intensity versus different concentrations of hyDNA. (C) The FL intensity versus different concentrations of streptavidin-HRP. (D) The FL intensity as a function of APP concentration.

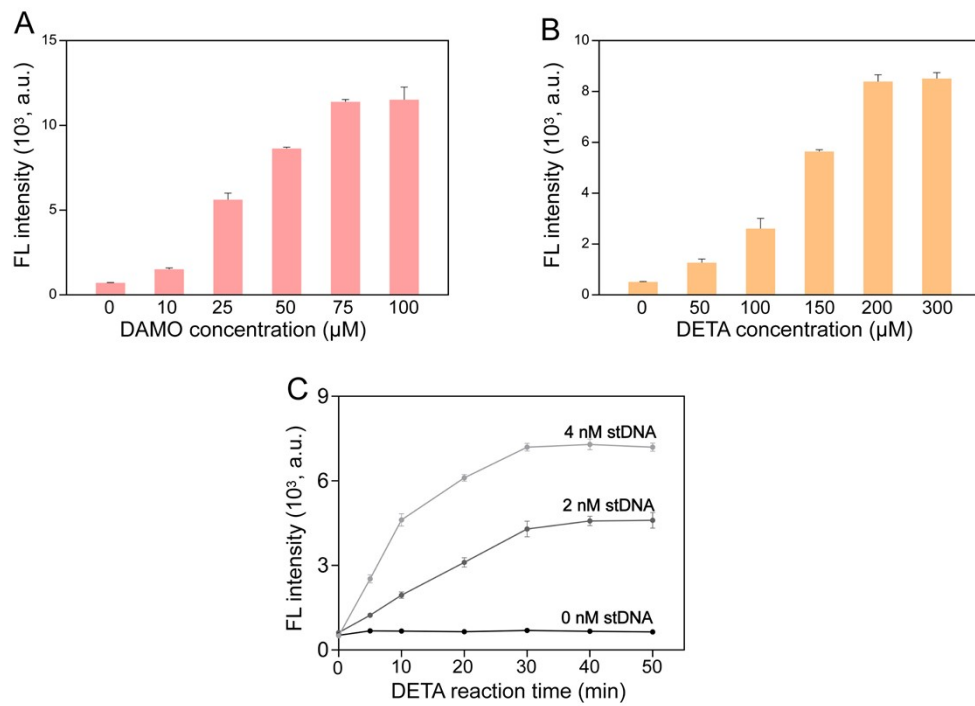

**Fig. S5** (A) The FL intensity versus different concentrations of DAMO. (B) The FL intensity versus different concentrations of DETA. (C) The FL intensity as a function of DETA reaction time.

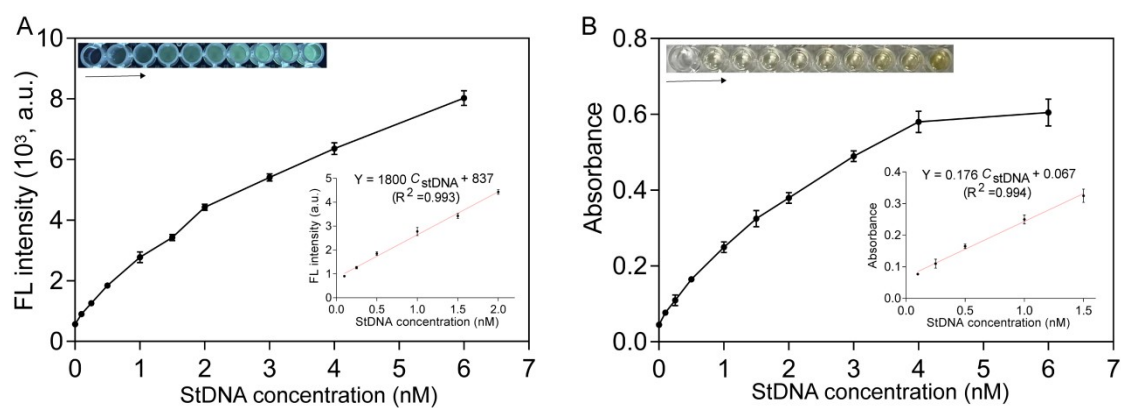

**Fig. S6** (A) The fluorescence intensity versus different concentrations of stDNA (0, 0.1, 0.25, 0.5, 1, 1.5, 2, 3, 4, 6 nM) based on PCDs (Top inset: visual image changes of increasing concentration of stDNA target under 365 nm UV light; right inset: a calibration curve over the range of 0.1-2 nM). (B) The absorbance intensity versus different concentrations of stDNA (0, 0.1, 0.25, 0.5, 1, 1.5, 2, 3, 4, 6 nM) based on PCDs (Top inset: visual image changes of increasing concentration of stDNA target under natural light; right inset: a calibration curve over the range of 0.1-1.5 nM)



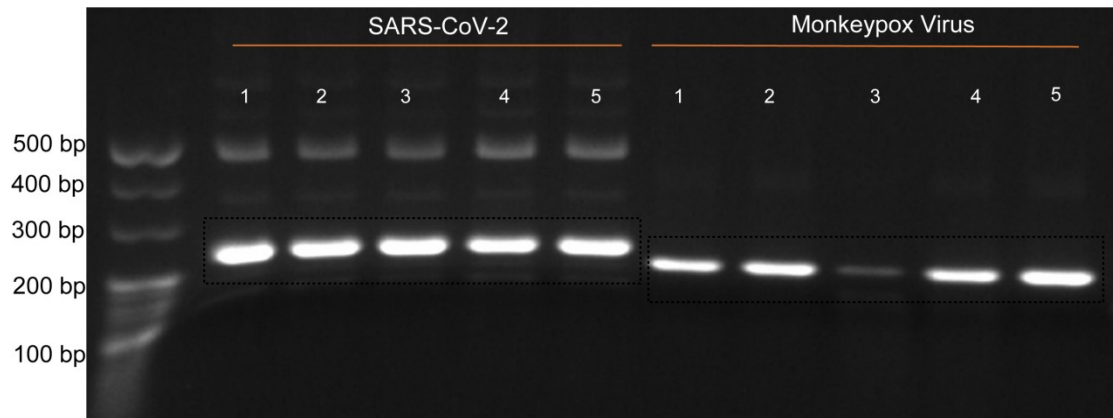

**Fig. S7** Agarose gel detection of the amplified products of pseudovirus corresponding to SARS-CoV-2 and Monkeypox Virus-F3L gene by RPA. **Red and blue frames represent five repeats experiments.**

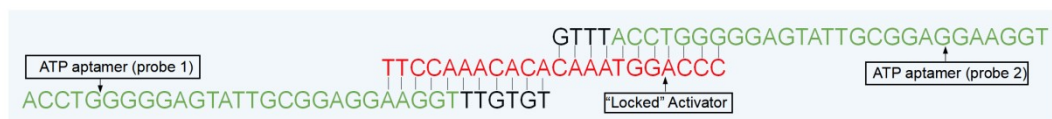

**Fig. S8** Design of the ATP aptamer and “Locked” Activator.

**Table. S1** DNA and RNA sequences used in this study.

| Name                           | Sequence (5'-3')                                         | Purpose                    |
|--------------------------------|----------------------------------------------------------|----------------------------|
| HyDNA sense strand             | Biotin-AAAAAAAAAAAAAAAAAAAAACACAACCATCA                  | For hyDNA                  |
| HyDNA anti-sense strand        | Bio-AAAAAAAAAATGATGGTTGTG                                | For hyDNA                  |
| FAM-hyDNA sense strand         | FAM-AAAAAAAAAAAAAAAAAAAAACACAACCATCA                     | Analysis of hyDNA cleavage |
| FAM-hyDNA antisense strand     | FAM-AAAAAAAAAATGATGGTTGTG                                | Analysis of hyDNA cleavage |
| COV-crRNA                      | UAAUUUCUACUAAGUGUAGAUCUGCUUGACAG<br>AUUGAACCA            | Target recognition         |
| MV-crRNA                       | UAAUUUCUAAGUGUAGAUCUAGCCUUAUCGAU<br>ACUCUU               | Target recognition         |
| RPA -(COV)-forward primer      | GAAATTCAACTCCAGGCAGCAGTAGGGGAAC                          | RPA                        |
| RPA -(COV)-reverse primer      | GAAAGCTTGTGTTACATTGTATGCTTTAGTG                          | RPA                        |
| RPA -(MV)-forward primer       | CTAAGAAGTTTATCTACAGCCAATTTAGCT                           | RT-RPA                     |
| RPA -(MV)-reverse primer       | GTCACCGTTATTAATGAGTACTGTCAAATA                           | RT-RPA                     |
| Target (COV) -sense strand     | TGATGCTGCTCTTGCTTTGCTGCTGCTTGACAGATTGA<br>ACCAGCTTGAGAGC | Target generation          |
| Target (COV) -antisense strand | GCTCTCAAGCTGGTTCAATCTGTCAAGCAGCAGCAA<br>GCAAGAGCAGCATCA  | Target Generation          |
| Target (FLU) -sense strand     | GAGCGTTTTGATGAAGGACATTCAAAGCCAATTCGAG<br>CA              | Target generation          |
| Target (FLU) -antisense strand | TGCTCGAATTGGCTTTGAATGTCCTTCATCAAAACGC<br>TC              | Target Generation          |
| Target (RSV) -sense strand     | GAGTATTTTGTGACACAATGAACAGTTTAACATTACC<br>AA              | Target generation          |
| Target (RSV) -antisense strand | TTGGTAATGTTAAACTGTTTCATTGTGTCACAAAATAC<br>TC             | Target Generation          |
| ATP-crRNA                      | UAAUUUCUACUAAGUGUAGUAAGGUUUGUGUGUU<br>UACCUG             | For ATP detection          |
| ATP-activator                  | CCCAGGTAAACACACAAACCTT                                   | For ATP detection          |
| Probe-1                        | ACCTGGGGGAGTATTGCGGAGGAAGGTTTGTGT                        | For ATP detection          |
| Probe-2                        | GTTTACCTGGGGGAGTATTGCGGAGGAAGGT                          | For ATP detection          |

**Table. S2** Comparison of the Calpin-CRISPR platform with other Cas12a-based single-readout biosensors for nucleic acids and ATP.

| Target  | Methods                                | LOD             | Ref.                  |
|---------|----------------------------------------|-----------------|-----------------------|
| ATP     | Fluorescence                           | 400 nM          | (Shu et al. 2022)     |
|         | chemiluminescence                      | 18 nM           | (Li et al. 2020)      |
|         | Fluorescence                           | 104 nM          | (Niu et al. 2021)     |
|         | Fluorescence                           | 4.75 $\mu$ M    | (Xiong et al. 2020)   |
|         | Colorimetry                            | 1 $\mu$ M       | (Samanta et al. 2022) |
|         | Colorimetry                            | 50 $\mu$ M      | (Tang et al. 2022)    |
|         | Fluorescent and colorimetric dual-mode | 10 $\mu$ M      | This work             |
| DNA/RNA | Fluorescence                           | 150 fM          | (Wang et al. 2022)    |
|         | Electrochemistry                       | 30 pM           | (Zhang et al. 2022)   |
|         | Colorimetry                            | 1 nM            | (Ma et al. 2021)      |
|         | Colorimetry                            | 40 pM           | (Li et al. 2019)      |
|         | Electrochemistry                       | 50 pM           | (Dai et al. 2019)     |
|         | Electrochemiluminescence               | 2.8 pM          | (Liu et al. 2022)     |
|         | Fluorescence                           | 10 nM           | (Chen et al. 2020)    |
|         | Fluorescent and colorimetric dual-mode | 23 pM and 48 pM | This work             |

## Supplementary references

- Chen, Y., Mei, Y., Zhao, X., Jiang, X., 2020. Reagents-loaded, automated assay that integrates recombinase-aided amplification and Cas12a nucleic acid detection for a point-of-care test. *Anal. Chem.* 92 (21), 14846-14852.
- Dai, Y., Somoza, R.A., Wang, L., Welter, J.F., Li, Y., Caplan, A.I., Liu, C.C., 2019. Exploring the trans-cleavage activity of CRISPR-Cas12a (Cpf1) for the development of a universal electrochemical biosensor. *Angew. Chem., Int. Ed. Engl.* 58 (48), 17399-17405.
- Li, C.Y., Zheng, B., Liu, Y.H., Gao, J.L., Zheng, M.Q., Pang, D.W., Tang, H.W., 2020. A boosting upconversion luminescent resonance energy transfer and biomimetic periodic chip integrated CRISPR/Cas12a biosensor for functional DNA regulated transduction of non-nucleic acid targets. *Biosens. Bioelectron.* 169, 112650.
- Li, Y., Mansour, H., Wang, T., Poojari, S., Li, F., 2019. Naked-eye detection of grapevine red-blotch viral infection using a plasmonic CRISPR Cas12a assay. *Anal. Chem.* 91 (18), 11510-11513.
- Liu, S., Wang, C., Wang, Z., Xiang, K., Zhang, Y., Fan, G.C., Zhao, L., Han, H., Wang, W., 2022. Binding induced isothermal amplification reaction to activate CRISPR/Cas12a for amplified electrochemiluminescence detection of rabies viral RNA via DNA nanotweezer structure switching. *Biosens. Bioelectron.* 204, 114078.
- Ma, L., Peng, L., Yin, L., Liu, G., Man, S., 2021. CRISPR-Cas12a-powered dual-mode biosensor for ultrasensitive and cross-validating detection of pathogenic bacteria. *ACS Sens.* 6 (8), 2920-2927.
- Niu, C., Wang, C., Li, F., Zheng, X., Xing, X., Zhang, C., 2021. Aptamer assisted CRISPR-Cas12a strategy for small molecule diagnostics. *Biosens. Bioelectron.* 183, 113196.
- Samanta, D., Ebrahimi, S. B., Ramani, N., & Mirkin, C. A., 2022. Enhancing CRISPR-Cas-mediated detection of nucleic acid and non-nucleic acid targets using enzyme-labeled reporters. *J. Am. Chem. Soc.* 144 (36), 16310-16315.
- Shu, X., Zhang, D., Li, X., Zheng, Q., Cai, X., Ding, S., Yan, Y., 2022. Integrating CRISPR-Cas12a with a crRNA-mediated catalytic network for the development of a modular and sensitive aptasensor. *ACS Synth. Biol.* 11 (8), 2829-2836.
- Tang, Y., Qi, L., Liu, Y., Guo, L., Zhao, R., Yang, M., Du, Y., & Li, B., 2022. CLIPON: A CRISPR-enabled strategy that turns commercial pregnancy test strips into general point-of-need test devices. *Angew. Chem., Int. Ed. Engl.* 61 (12), e202115907.
- Wang, X., Qin, Y., Huang, Y., Hu, K., Zhao, S., Tian, J., 2022. A sensitive and facile microRNA detection based on CRISPR-Cas12a coupled with strand displacement amplification. *Spectrochim. Acta. A. Mol. Biomol. Spectrosc.* 279, 121476.
- Xiong, Y., Zhang, J., Yang, Z., Mou, Q., Ma, Y., Xiong, Y., Lu, Y., 2020. Functional DNA regulated CRISPR-Cas12a sensors for point-of-care diagnostics of non-nucleic-acid targets. *J. Am. Chem. Soc.* 142 (1), 207-213.
- Zhang, D., Yan, Y., Que, H., Yang, T., Cheng, X., Ding, S., Zhang, X., Cheng, W., 2020. CRISPR/Cas12a-mediated interfacial cleaving of hairpin DNA reporter for electrochemical nucleic acid sensing. *ACS Sens.* 5 (2), 557-562.
